# Supplementary material for: Bacterial production and direct functional screening of expanded molecular libraries for discovering inhibitors of protein aggregation
Source: PubMed Central journal article supplement (PMC6795521; doi:10.1126/sciadv.aax5108), 2019-10-16
Supplement: aax5108_SM.pdf [file aax5108_SM.pdf]

## Supplementary Materials for

### **Bacterial production and direct functional screening of expanded molecular libraries for discovering inhibitors of protein aggregation**

Dafni C. Delivoria, Sean Chia, Johnny Habchi, Michele Perni, Ilias Matis, Nikoletta Papaevgeniou, Martin Reczko, Niki Chondrogianni, Christopher M. Dobson, Michele Vendruscolo, Georgios Skretas\*

\*Corresponding author. Email: gskretas@eie.gr

Published 16 October 2019, *Sci. Adv.* **5**, eaax5108 (2019)

DOI: 10.1126/sciadv.aax5108

#### **This PDF file includes:**

Section S1. Supplementary Materials and Methods

Fig. S1. Identification of potential A $\beta$ 42 aggregation inhibitors using a bacterial genetic screen.

Fig. S2. Identification of different cyclic peptide clusters appearing in the sorted population.

Fig. S3. A $\beta$ C7-1 and A $\beta$ C7-14 inhibit the aggregation of A $\beta$ 42 in vitro.

Fig. S4. A $\beta$ C7-1 and A $\beta$ C7-14 inhibit the aggregation of A $\beta$ 42 in vivo.

Table S1. Deep sequencing analysis of the peptide-encoding regions of ~3.4 million clones from the constructed pSICLOPPS-NuX<sub>1</sub>X<sub>2</sub>X<sub>3</sub>X<sub>4</sub>X<sub>5</sub>X<sub>6</sub> library.

Table S2. Enrichment (blue) and depletion (red) of the 20 amino acids in each position of the heptapeptide sequences.

Table S3. Distribution of the heptapeptide sequences in the different clusters identified.

Table S4. Sequences and frequency of appearance of cluster I and cluster II heptapeptide sequences as determined by high-throughput sequencing of the enriched library after the seventh round of sorting.

Table S5. Molecular properties of the selected cyclic heptapeptides A $\beta$ C7-1 and A $\beta$ C7-14 compared to those of conventional drugs, oral macrocyclic (MC) drugs, and nonoral MC drugs.

Table S6. Plasmids and PCR primers used in this study.

References (52, 53)

## Section S1. Supplementary Materials and Methods

### Reagents and chemicals

All enzymes for recombinant DNA used in this study were purchased from New England Biolabs with the exception of alkaline phosphatase FastAP which was obtained from ThermoFisher Scientific. Recombinant plasmids were purified using Macherey-Nagel NucleoSpin Plasmid and Qiagen Plasmid Mini and Midi kits. PCR products and DNA extracted from agarose gels were purified using Macherey-Nagel Nucleospin Gel and PCR Clean-up. Synthetic A $\beta$ C7-1 and A $\beta$ C7-14 were purchased from Proteogenix (France). Before each experiment, A $\beta$ C7-1 was freshly dissolved in 50% acetonitrile/0.1% Tween-20 and A $\beta$ C7-14 was dissolved in 30% acetonitrile/0.025% Tween-20 to form 10 mM solutions. Under these conditions, both cyclic heptapeptides were stably in a monomeric form for the duration of the *in vitro* experiments, as determined by dynamic light scattering (data not shown).

### Plasmid constructions

For the construction of pSICLOPPS(H24L/F26A)-A $\beta$ C7-1, pSICLOPPS(H24L/F26A)-A $\beta$ C7-2, pSICLOPPS(H24L/F26A)-A $\beta$ C7-3, pSICLOPPS(H24L/F26A)-A $\beta$ C7-7 and pSICLOPPS(H24L/F26A)-A $\beta$ C7-14, plasmids pSICLOPPS-A $\beta$ C7-1, pSICLOPPS-A $\beta$ C7-2, pSICLOPPS-A $\beta$ C7-3, pSICLOPPS-A $\beta$ C7-7 and pSICLOPPS-A $\beta$ C7-14 were digested with BglII and HindIII and the resulting inserts were ligated into a similarly digested pSICLOPPS(H24L/F26A)KanR vector (18). For the construction of pSICLOPPS-A $\beta$ C7-371, pSICLOPPS-A $\beta$ C7-405 and pSICLOPPS-A $\beta$ C7-416, forward primers DD175, DD176 and DD178 were used individually, in pair with the reverse primer GS035 and using pSICLOPPS as a template and the resulting PCR products were digested with BglII and HindIII and ligated into a similarly digested pSICLOPPSKanR (18). For the construction of

pSICLOPPS-A $\beta$ C7-1(C1S), pSICLOPPS-A $\beta$ C7-1(C1T), pSICLOPPS-A $\beta$ C7-1(K2A), pSICLOPPS-A $\beta$ C7-1(V3A), pSICLOPPS-A $\beta$ C7-1(W4A), pSICLOPPS-A $\beta$ C7-1(Q5A), pSICLOPPS-A $\beta$ C7-1(L6A), pSICLOPPS-A $\beta$ C7-1(L7A), pSICLOPPS-A $\beta$ C7-14(C1S), pSICLOPPS-A $\beta$ C7-14(C1T), pSICLOPPS-A $\beta$ C7-14(R2A), pSICLOPPS-A $\beta$ C7-14(I3A), pSICLOPPS-A $\beta$ C7-14(V4A), pSICLOPPS-A $\beta$ C7-14(P5A), pSICLOPPS-A $\beta$ C7-14(S6A) and pSICLOPPS-A $\beta$ C7-14(L7A), forward primers DD129, DD130, DD131, DD132, DD133, DD134, DD135, DD136, DD137, DD138, DD139, DD140, DD141, DD142, DD143 and DD144 were used individually, in pair with the reverse primer GS035 and using pSICLOPPS-A $\beta$ C7-1 or pSICLOPPS-A $\beta$ C7-14 as a template, accordingly. The resulting PCR products were digested with BglI and HindIII and ligated into a similarly digested pSICLOPPSKanR (18). For the construction of pET-A $\beta$ 42, the A $\beta$ 42 gene was amplified using primers DD004 and IM022 as well as pA $\beta$ 42-GFP (24) as a template. The resulting PCR product was digested with NcoI and XhoI and inserted into a similarly digested pET28a (+) (Novagen, USA).

### **Protein/cyclic peptide production in liquid cultures**

Protein and cyclic peptide overexpression were performed essentially as described previously (18). Briefly, *E. coli* Tuner (DE3) cells freshly transformed with the appropriate expression vectors were used for all protein production experiments. Single bacterial colonies were used to inoculate liquid LB cultures containing 40  $\mu$ g/mL chloramphenicol and 50  $\mu$ g/mL kanamycin. These cultures were used with a 1:100 dilution to inoculate fresh LB media containing 0.02% L (+)-arabinose which were grown at 37 °C to an OD<sub>600</sub> of ~0.4 with shaking, at which point protein production was induced by the addition of 0.1 mM IPTG for 2 h.

## **Bacterial cell fluorescence**

Bulk bacterial fluorescence measurements were carried out as described previously (18). Briefly, after protein overexpression, cells corresponding to 1 mL culture with  $OD_{600}=1$  were harvested by centrifugation, re-suspended in 100  $\mu$ L phosphate-buffered saline (PBS), transferred to a 96-well FLUOTRAC 200 plate (Greiner Bio One International, Austria) and after excitation at 488 nm, their fluorescence was measured at 510 nm using a TECAN Safire II-Basic plate reader (Tecan, Austria). For ThS fluorescence measurements, a similar procedure was followed with the exception that cells were re-suspended in 250  $\mu$ M ThS in PBS, equilibrated for 15 min and then emission spectra were recorded at a range of 460-600 nm. For flow cytometric measurements, after protein overexpression, fluorescence of 50,000 cells resuspended in PBS was recorded at 530/30 nm after GFP excitation at 488nm, using a BD FACSAria II system (BD Biosciences, USA).

## **In-gel fluorescence and western blot analyses**

After protein overexpression, cells corresponding to 1 mL culture with  $OD_{600}=1$  were harvested by centrifugation and re-suspended in 100  $\mu$ L PBS. Samples were lysed by brief sonication cycles on ice and the resulting lysates (total fraction) were clarified by centrifugation at 13,000 rpm for 25 min (soluble fraction). Samples were analyzed by native or SDS-PAGE, on 10 or 15% gels respectively and without prior boiling (for in-gel fluorescence) or after boiling of the samples for 10 min (for western blotting). In-gel fluorescence was analyzed on a ChemiDoc-It<sup>2</sup> Imaging System equipped with a CCD camera and a GFP filter (UVP, UK), after exposure for about 3 sec. For western blotting, proteins were transferred to polyvinylidene fluoride (PVDF) membranes (Merck, Germany) for 1 h at 12 V on a semi-dry blotter (Thermo Fisher, USA). Membranes were blocked with 5% non-fat dry milk in Tris-buffered saline containing 0.1% Tween-20 (TBST) for 1 h at room temperature. After washing with TBST three times, membranes were incubated with

the appropriate antibody diluted in 0.5% non-fat dry milk in TBST at room temperature for 1 h. The utilized antibodies were a mouse anti-A $\beta$  (6E10) (Covance, USA) at 1:2,000 dilution, a mouse anti-CBD antibody (New England Biolabs, USA) at 1:100,000 dilution and a horseradish peroxidase-conjugated goat anti-mouse secondary antibody (BioRad) at 1:4000 dilution. The proteins were then visualized using the ChemiDoc-It<sup>2</sup> Imaging System (UVP, UK).

### **Preparation of A $\beta$ 42**

The recombinant A $\beta$  (M1-42) peptide (MDAEFRHDSGYEVHHQKLVFFAEDVGSNKG AIIGLMVGGVVIA), herein termed A $\beta$ 42, was expressed in *E. coli* and purified as described previously (30). The lyophilized peptide was then dissolved in 6 M GuHCl, further purified using a Superdex 75 10/300 GL column (GE Healthcare) and eluted in 20 mM sodium phosphate buffer, pH 8, supplemented with 200  $\mu$ M EDTA and 0.02% NaN<sub>3</sub>. The centre of the peak was collected and A $\beta$ 42 concentration was determined from the absorbance of the integrated peak area using  $\epsilon_{280} = 1,490 \text{ M}^{-1} \text{ cm}^{-1}$ .

### **Transmission electron microscopy**

TEM experiments were performed as described previously (52). Briefly, 5  $\mu$ L aliquots from each sample were removed after the aggregation reaction had reached the final plateau and placed on a carbon support film on 400-mesh copper grid (EM Resolutions Ltd.). After adsorption, grids were negatively stained with 2% w/v uranyl acetate and images were recorded using a FEI Tecnai G<sub>2</sub> transmission electron microscope (Cambridge Advanced Imaging Centre) and analyzed using the SIS Megaview II Image Capture system (Olympus).

### **Dot blots**

The dot blot assay was performed as described previously (30) while samples were prepared as for the kinetic experiments albeit in the absence of ThT. 2  $\mu$ L aliquots of each sample were removed at different time points and spotted onto a nitrocellulose membrane (0.2  $\mu$ m; Whatman). The membranes were then dried, blocked with 5% non-fat dry milk in PBST (0.1%) and incubated with an A $\beta$ 42 fibril-specific primary antibody (OC, Millipore) and Alexa-Fluor 488-conjugated secondary antibody (Life Technologies) according to the manufacturer's instructions. Fluorescence detection was performed using the Typhoon Trio Imager (GE Healthcare) and fluorescence quantification was performed using the ImageJ software (National Institutes of Health).

### ***C. elegans* paralysis**

The paralysis assay was performed using standard procedures and as described previously (18). Briefly, synchronized L4 larvae CL4176 {smg-1 (cc546) I; dvIs27 [myo-3::A $\beta$  (1-42)-let 3'UTR (pAF29); pRF4 (rol-6 (su1006)] (32)} (~150-300 per condition) were transferred to NGM plates, that were seeded with *E. coli* OP50 and contained 10  $\mu$ M of the cyclic peptides in 1% acetonitrile, and were incubated at 16 °C for 48 h before transgene induction via temperature up-shift to 25 °C. Synchronized offspring were randomly distributed to treatment plates to avoid systematic differences in egg lay batches. Treatment and control plates were handled, scored and assayed in parallel. Scoring of paralyzed animals was initiated 24 h after temperature up-shift. Worms were considered as paralyzed upon failure to move their half end-body upon prodding, while animals that died were excluded from the assay. The log-rank (Mantel–Cox) test was used to evaluate differences between paralysis curves and to determine *P* values for all independent data. *n* in paralysis figures is the number of animals that paralyzed over the total number of animals used (the number of paralyzed animals plus the number of dead and censored animals). Median paralysis values are expressed as mean  $\pm$  s.e.m.

## Supplementary Figures

**A**

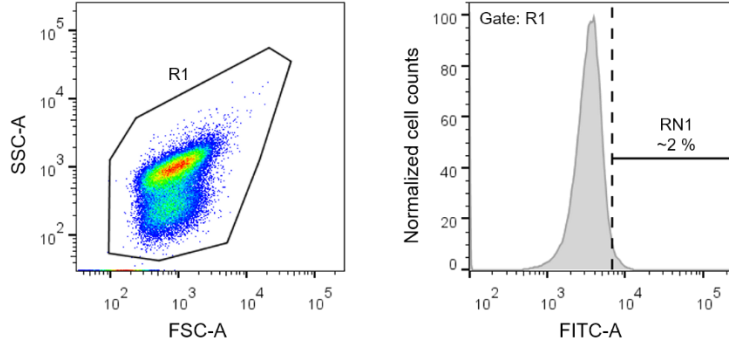

**B**

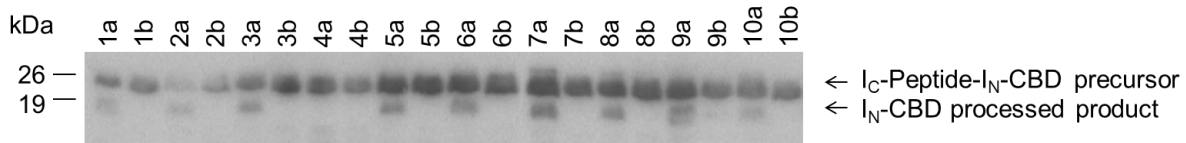

**C**

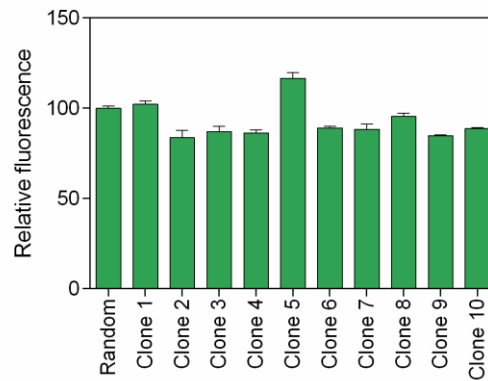

**D**

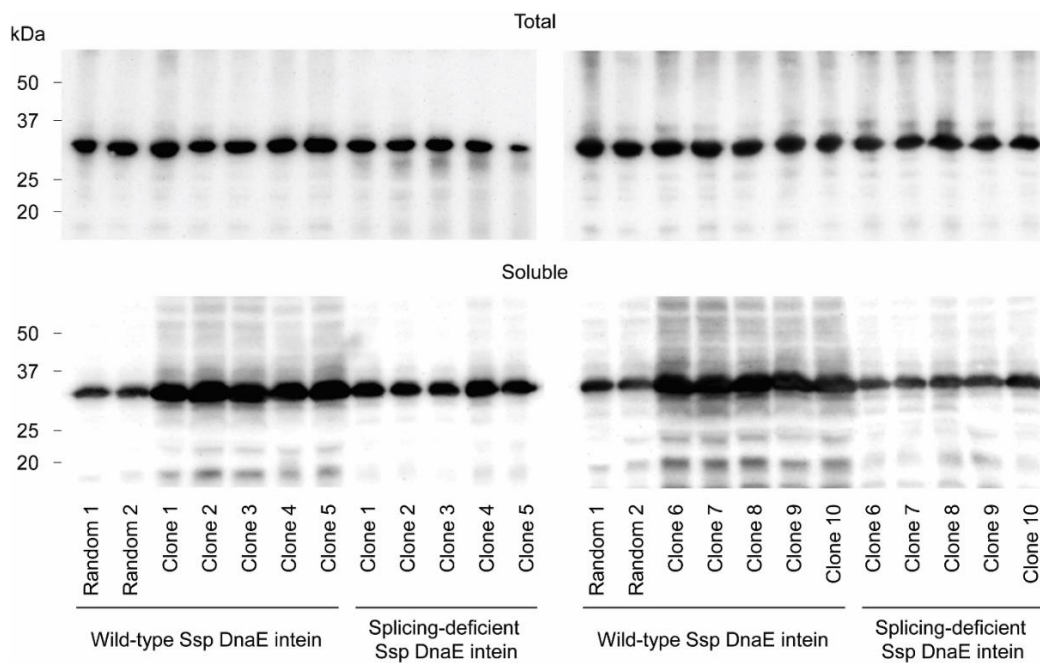

E

| Isolated Clone # | DNA sequence of peptide-encoding region | Encoded peptide sequence |
|------------------|-----------------------------------------|--------------------------|
| 1                | TGC AGG GTG TGG ACG GAG TTG             | CRVWTEL                  |
| 2                | TGC AAG GTG TGG CAG TTG TTG             | CKVWQLL                  |
| 3                | TGC AAG GTG TGG CAG TTG TTG             | CKVWQLL                  |
| 4                | TGC ATC GTC GTC CCG TCG ATC             | CIVVPSI                  |
| 5                | TGC AAG GTC TGG ATG CCG CTC             | CKVWMPL                  |
| 6                | TGC AAG GTG TGG CAG TTG TTG             | CKVWQLL                  |
| 7                | TGC AAG GTG TGG CAG TTG TTG             | CKVWQLL                  |
| 8                | TGC AAG GTG TGG CAG TTG TTG             | CKVWQLL                  |
| 9                | TGC CGC ATC GTC CCC AGC TTG             | CRIVPSL                  |
| 10               | TGC AAG GTG TGG CAG TTG TTG             | CKVWQLL                  |

F



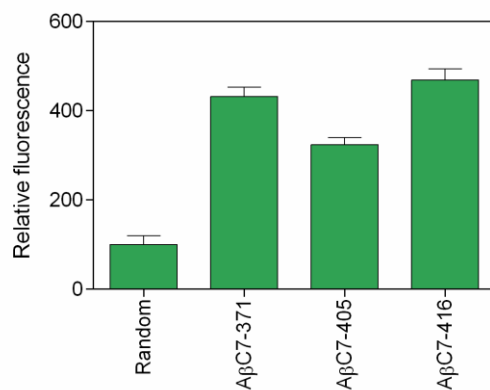

**Fig. S1. Identification of potential Aβ42 aggregation inhibitors using a bacterial genetic screen.**

**(A)** Gating strategy for the isolation of aggregation inhibitors using FACS.

(left) Cells were first gated based on their forward and side scatter properties, in order to eliminate non-cellular events. (right) The selected cells were subjected to multiple rounds of FACS sorting, each time isolating the bacterial population exhibiting the top ~2% fluorescence.

**(B)** Western blot analysis of the ten selected clones (**Fig. 2C**) using an anti-CBD antibody.

The upper band of ~25 kDa corresponds to the I<sub>C</sub>-peptide sequence-I<sub>N</sub>-CBD precursor, while the lower band of ~20 kDa corresponds to the processed I<sub>N</sub>-CBD product, whose appearance is an indication of successful cyclic peptide formation. CBD: chitin-binding domain.

For each clone, (a) represents a wild-type intein where cyclic peptide formation is allowed, while (b) represents the H24L/F26A splicing deficient variant where no cyclic peptide is produced.

**(C)** Relative fluorescence of *E. coli* Tuner(DE3) cells overexpressing p53(Y220C)-GFP and the ten selected cyclic heptapeptide clones tested in **Fig. 2C**.

The fluorescence of the bacterial population producing the random cyclic peptide was arbitrarily set to 100. Experiments were carried out in replica triplicates ( $n=1$  independent experiment) and the reported values correspond to the mean value  $\pm$  s.e.m.

**(D)** Western blot analysis of total (top) and soluble (bottom) lysates of *E. coli* Tuner(DE3) cells overexpressing Aβ42-GFP and the ten individual cyclic peptide sequences tested in **Fig. 2C**

using either the wild-type split-intein construct or the splicing-deficient variant H24L/F26A

and utilizing the anti-A $\beta$  antibody 6E10 for probing. The predicted molecular mass of the A $\beta$ 42-GFP fusion is ~32 kDa. **(E)** Cyclic heptapeptide sequences encoded by the selected bacterial clones exhibiting enhanced A $\beta$ 42-GFP fluorescence. **(F)** Relative fluorescence of *E. coli* Tuner(DE3) cells co-expressing A $\beta$ 42-GFP and three cyclic heptapeptide sequences appearing in the sorted pool only at low frequencies as shown in **Table S4**. The fluorescence of the cell population producing a random cyclic peptide was arbitrarily set to 100. Experiments were carried out in triplicates ( $n=1$  independent experiments) and the reported values correspond to the mean value  $\pm$  s.e.m.



that do not share at least 70% homology with any other cyclic peptide from the selected pool.

A

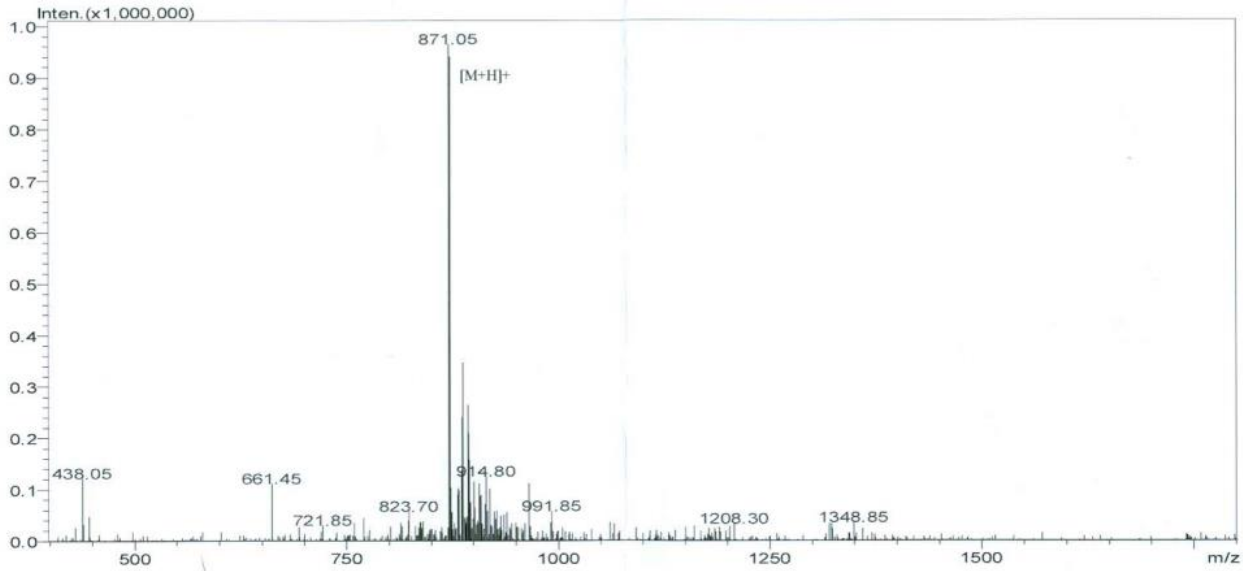

|                                 |                     |          |             |               |
|---------------------------------|---------------------|----------|-------------|---------------|
| Sample Information              | Probe:              | ESI      | Probe Bias: | +4.5kv        |
| Injection Volume : 1.00 $\mu$ l | Nebulizer Gas Flow: | 1.5L/min | Detector:   | 1.5kv         |
| Sample: CL-7                    | CDL:                | -20.0v   | T. Flow:    | 0.2ml/min     |
| M.W.: 870.10                    | CDL Temp.:          | 250 °C   | B. Conc.:   | 50%H2O/50%ACN |
| Lot. No.: P160504-GY502012      | Block Temp.:        | 200 °C   |             |               |

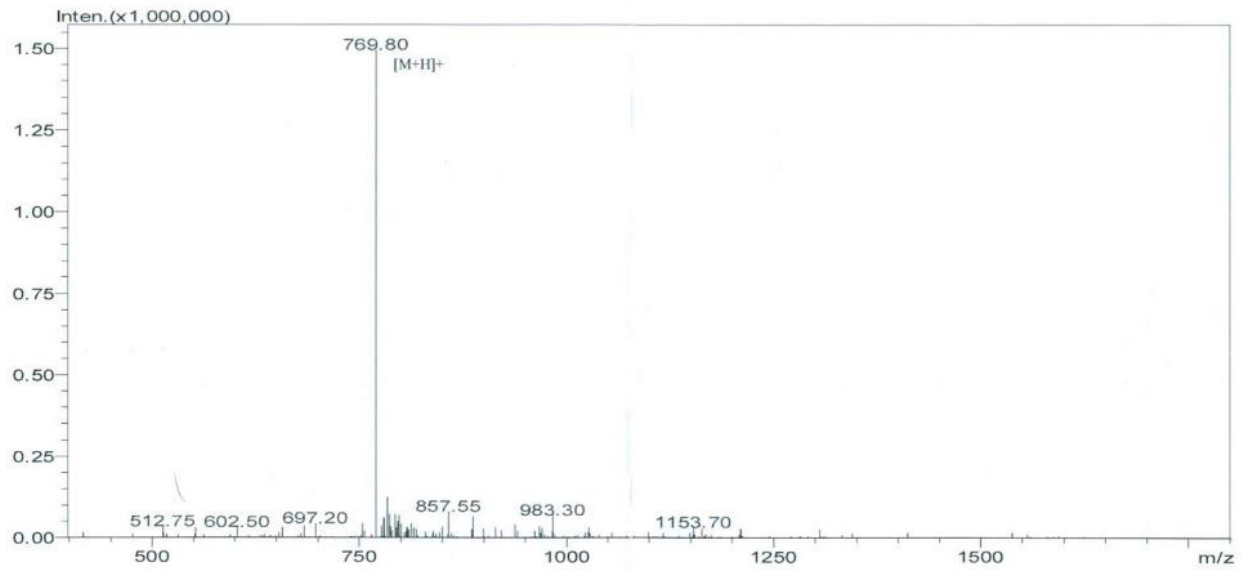

|                                 |                     |          |             |               |
|---------------------------------|---------------------|----------|-------------|---------------|
| Sample Information              | Probe:              | ESI      | Probe Bias: | +4.5kv        |
| Injection Volume : 1.00 $\mu$ l | Nebulizer Gas Flow: | 1.5L/min | Detector:   | 1.5kv         |
| Sample: CL-7                    | CDL:                | -20.0v   | T. Flow:    | 0.2ml/min     |
| M.W.: 768.98                    | CDL Temp.:          | 250 °C   | B. Conc.:   | 50%H2O/50%ACN |
| Lot. No.: P160504-GY502013      | Block Temp.:        | 200 °C   |             |               |

B

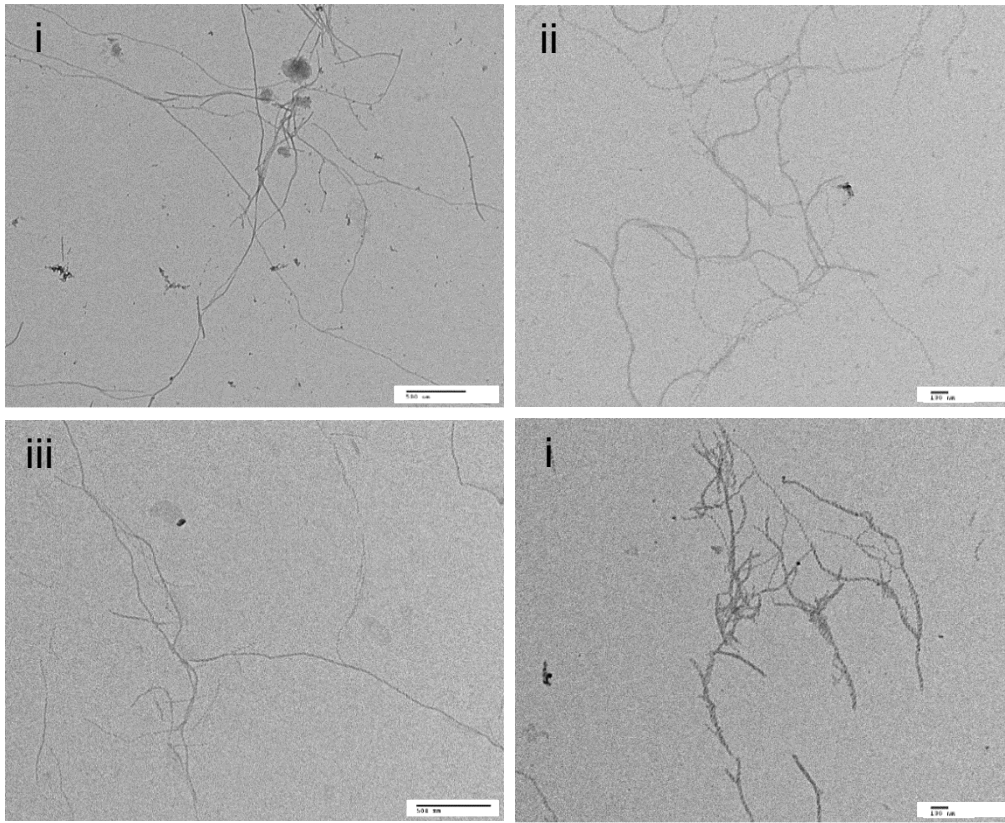

**C**

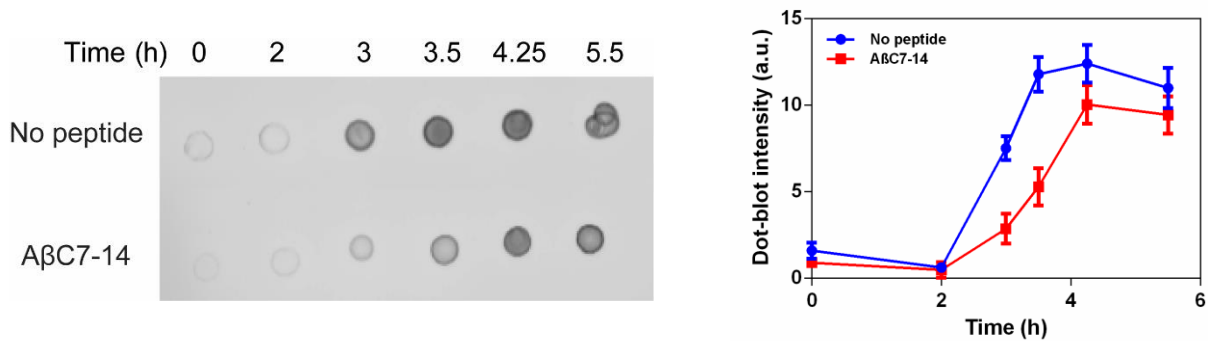

**Fig. S3. AβC7-1 and AβC7-14 inhibit the aggregation of Aβ42 in vitro.** (A) Full scan spectrum (ESI-MS) of the synthesized AβC7-1 (top) and AβC7-14 (bottom) by solid-phase chemical synthesis. (B) TEM images of 2 μM Aβ42 fibrils in the absence (left) and presence (right) of either 10 μM AβC7-1 (top) or 4 μM AβC7-14 (bottom). Samples were taken at the reaction end point as measured by thioflavin T. (C) Time course of the aggregation of 2 μM Aβ42 in the presence and absence of 0.5 μM AβC7-14 using a dot blot assay and the Aβ42 fibril-specific antibody OC. Mean values ± s.e.m. are presented (n= 1 experiment performed in three replicates).

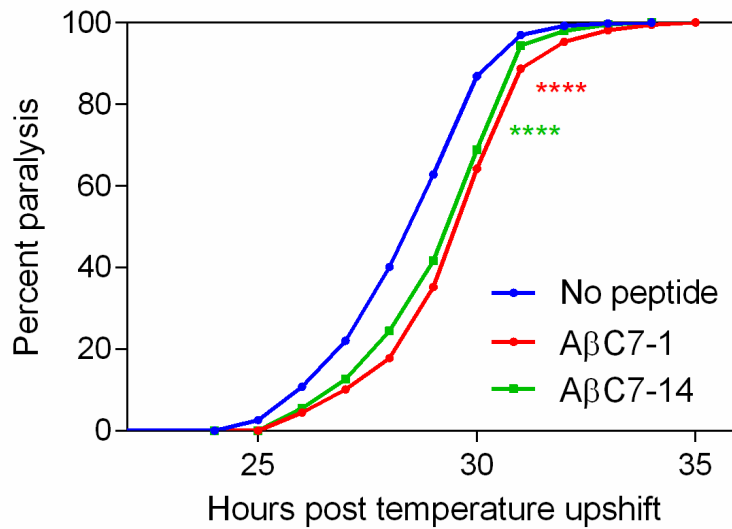

**Fig. S4. AβC7-1 and AβC7-14 inhibit the aggregation of Aβ42 in vivo.** Paralysis curves of *C. elegans* CL4176 expressing human Aβ42 and treated with 10 μM of synthetic AβC7-1 and AβC7-14. The “No peptide” sample (control) contains the same amount of solvent as the test samples (1% acetonitrile). No peptide: mean=28.4±0.2, n=863/867; AβC7-1: mean=29.5±0.1, n=867/873, P<0.0001; and AβC7-14: mean=29.2±0.1, n=887/893, P<0.0001.

## Supplementary Tables

**Table S1. Deep sequencing analysis of the peptide-encoding regions of ~3.4 million clones from the constructed pSICLOPPS-NuX<sub>1</sub>X<sub>2</sub>X<sub>3</sub>X<sub>4</sub>X<sub>5</sub>X<sub>6</sub> library.**

|                                                                                                                 | <b>Number of reads</b> | <b>Unique DNA sequences</b> | <b>Unique peptide sequences</b> |
|-----------------------------------------------------------------------------------------------------------------|------------------------|-----------------------------|---------------------------------|
| cyclo- CysX <sub>1</sub> X <sub>2</sub> X <sub>3</sub> X <sub>4</sub> X <sub>5</sub> X <sub>6</sub> sub-library | 1,305,675              | 1,023,580 (78%)             | 978,803 (96%)                   |
| cyclo-SerX <sub>1</sub> X <sub>2</sub> X <sub>3</sub> X <sub>4</sub> X <sub>5</sub> X <sub>6</sub> sub-library  | 1,318,365              | 885,393 (67%)               | 824,134 (93%)                   |
| cyclo-ThrX <sub>1</sub> X <sub>2</sub> X <sub>3</sub> X <sub>4</sub> X <sub>5</sub> X <sub>6</sub> sub-library  | 769,605                | 652,099 (85%)               | 636,647 (98%)                   |
| <b>Combined cyclo-NuX<sub>1</sub>X<sub>2</sub>X<sub>3</sub>X<sub>4</sub>X<sub>5</sub>X<sub>6</sub> library</b>  | <b>3,393,645</b>       | <b>2,561,072 (75%)</b>      | <b>2,439,584 (95%)</b>          |



**Table S2. Enrichment (blue) and depletion (red) of the 20 amino acids in each position of the heptapeptide sequences. Values represent the log<sub>2</sub> fold change of the amino acid distribution of peptides from the selected pool compared to the initial library.**

|            |   | Position |      |      |      |      |      |      |
|------------|---|----------|------|------|------|------|------|------|
|            |   | 1        | 2    | 3    | 4    | 5    | 6    | 7    |
| Amino Acid | A |          | -2.4 | -5.1 | -5   | -2.9 | 0.6  | -0.6 |
|            | I |          | -0.5 | -0.1 | -1.3 | 0.7  | -3.7 | 1.8  |
|            | L |          | -4.8 | -0.3 | -3.2 | -1.9 | 1.5  | 3.3  |
|            | V |          | -1.8 | 3.2  | 0.1  | -1.6 | 0.4  | 0.1  |
|            | F |          | -4.7 | -3.9 | -4.6 | -5   | 0.2  | -0.3 |
|            | W |          | -5.2 | -2.9 | 3.8  | -2.1 | -1.9 | -3.2 |
|            | Y |          | -1.2 | -0.3 | -4.8 | -2.2 | 0.1  | -7.3 |
|            | N |          | -3.5 | -2   | -3.9 | -1.2 | -2.1 | -7.4 |
|            | Q |          | -0.8 | -0.4 | -4.9 | 3.9  | 0.2  | -1.5 |
|            | C | 1.4      | -1.3 | -3.4 | -5.6 | 0.9  | -2   | -4.8 |
|            | M |          | -3   | -2.5 | -2.5 | 3.4  | -2.1 | -2.6 |
|            | S | -6.7     | -0.9 | -1.6 | -4.8 | 0.8  | -0.7 | -6.7 |
|            | T | -7.1     | -1.3 | -4.2 | 0.8  | 1    | -0.1 | -1.2 |
|            | D |          | -4.7 | -4.4 | -5.9 | -6.6 | -2.3 | -8.1 |
|            | E |          | -1.8 | -3.6 | -6.2 | -4.7 | 1.8  | -6.9 |
|            | R |          | 2.1  | -5   | -2.5 | -6.2 | -4.1 | -2.7 |
|            | H |          | -4   | -5.6 | -5.7 | -6.2 | -0.1 | -5.6 |
|            | K |          | 4.2  | -6.6 | -5.6 | -0.4 | 1.5  | -3.3 |
|            | P |          | -4.5 | -2.9 | 0    | 0.4  | 1.9  | 0.6  |
|            | G |          | -1.8 | -6.2 | -5.1 | -4.6 | -3.4 | -6.5 |

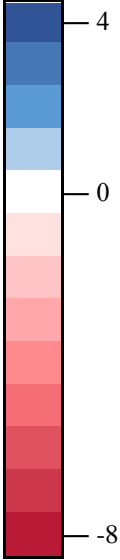

**Table S3. Distribution of the heptapeptide sequences in the different clusters identified.**

| <b>Number</b> | <b>Cluster name</b> | <b>Number of reads</b> | <b>Number of unique peptides</b> | <b>Cluster Reads/Total reads (%)</b> | <b>Peptides/Total peptides (%)</b> |
|---------------|---------------------|------------------------|----------------------------------|--------------------------------------|------------------------------------|
| 1             | I                   | 303,245                | 107                              | 75.01                                | 25.72                              |
| 2             | II                  | 19,690                 | 25                               | 4.87                                 | 6.01                               |
| 3             | III                 | 16,667                 | 64                               | 4.12                                 | 15.38                              |
| 4             | IV                  | 6,047                  | 44                               | 1.50                                 | 10.58                              |
| 5             | V                   | 5,362                  | 20                               | 1.33                                 | 4.81                               |
| 6             | VI                  | 2,837                  | 12                               | 0.70                                 | 2.88                               |
| 7             | VII                 | 2,192                  | 6                                | 0.54                                 | 1.44                               |
| 8             | VIII                | 1,987                  | 5                                | 0.49                                 | 1.20                               |
| 9             | IX                  | 1,700                  | 2                                | 0.42                                 | 0.48                               |
| 10            | X                   | 1,545                  | 6                                | 0.38                                 | 1.44                               |
| 11            | XI                  | 1,290                  | 4                                | 0.32                                 | 0.96                               |
| 12            | XII                 | 611                    | 2                                | 0.15                                 | 0.48                               |
| 13            | XIII                | 606                    | 11                               | 0.15                                 | 2.64                               |
| 14            | XIV                 | 482                    | 2                                | 0.12                                 | 0.48                               |
| 15            | XV                  | 258                    | 3                                | 0.06                                 | 0.72                               |
| 16            | XVI                 | 235                    | 2                                | 0.06                                 | 0.48                               |
| 17            | XVII                | 95                     | 2                                | 0.02                                 | 0.48                               |
| 18            | XVIII               | 86                     | 2                                | 0.02                                 | 0.48                               |
| 19            | XIX                 | 54                     | 2                                | 0.01                                 | 0.48                               |
| 20            | XX                  | 42                     | 2                                | 0.01                                 | 0.48                               |
| 21            | Singletons          | 39,249                 | 93                               | 9.71                                 | 22.36                              |
| <b>Sum</b>    |                     | <b>404,280</b>         | <b>416</b>                       | <b>100</b>                           | <b>100</b>                         |

**Table S4. Sequences and frequency of appearance of cluster I and cluster II heptapeptide sequences as determined by high-throughput sequencing of the enriched library after the seventh round of sorting.**

| Cluster I |              |                     |   |   |   |   |   |   |                 |                                 |                                    |
|-----------|--------------|---------------------|---|---|---|---|---|---|-----------------|---------------------------------|------------------------------------|
| Number    | Peptide name | Amino acid sequence |   |   |   |   |   |   | Number of reads | Reads/Total Cluster I reads (%) | Reads/Total heptapeptide reads (%) |
| 1         | AβC7-1       | C                   | K | V | W | Q | L | L | 64118           | 21.144                          | 15.86                              |
| 2         | AβC7-2       | C                   | K | V | W | M | P | L | 42464           | 14.003                          | 10.504                             |
| 3         | AβC7-3       | C                   | R | V | W | T | E | L | 28675           | 9.456                           | 7.093                              |
| 4         | AβC7-5       | C                   | R | V | W | M | V | P | 20170           | 6.651                           | 4.989                              |
| 5         | AβC7-6       | C                   | R | V | W | C | A | L | 18397           | 6.067                           | 4.551                              |
| 6         | AβC7-7       | C                   | R | V | W | Q | T | V | 14267           | 4.705                           | 3.529                              |
| 7         | AβC7-8       | C                   | S | V | W | M | E | L | 12638           | 4.168                           | 3.126                              |
| 8         | AβC7-9       | C                   | R | V | W | Q | A | L | 11718           | 3.864                           | 2.898                              |
| 9         | AβC7-10      | C                   | K | V | W | Q | V | L | 9249            | 3.05                            | 2.288                              |
| 10        | AβC7-11      | C                   | R | V | W | S | L | L | 9124            | 3.009                           | 2.257                              |
| 11        | AβC7-12      | C                   | K | V | W | M | A | L | 7513            | 2.478                           | 1.858                              |
| 12        | AβC7-13      | C                   | K | V | W | S | Q | L | 7166            | 2.363                           | 1.773                              |
| 13        | AβC7-15      | C                   | R | V | W | Q | L | L | 6030            | 1.988                           | 1.492                              |
| 14        | AβC7-19      | C                   | R | V | W | C | E | L | 5223            | 1.722                           | 1.292                              |
| 15        | AβC7-20      | C                   | K | V | W | M | E | V | 5043            | 1.663                           | 1.247                              |
| 16        | AβC7-22      | C                   | R | V | W | S | P | L | 4843            | 1.597                           | 1.198                              |
| 17        | AβC7-23      | C                   | R | V | W | M | G | L | 4212            | 1.389                           | 1.042                              |
| 18        | AβC7-24      | C                   | T | V | W | M | A | I | 3654            | 1.205                           | 0.904                              |
| 19        | AβC7-26      | C                   | V | V | W | Q | P | L | 2611            | 0.861                           | 0.646                              |
| 20        | AβC7-27      | C                   | R | V | W | Q | V | V | 2595            | 0.856                           | 0.642                              |
| 21        | AβC7-29      | C                   | R | V | W | S | A | L | 2327            | 0.767                           | 0.576                              |
| 22        | AβC7-30      | C                   | A | V | W | Q | A | L | 2280            | 0.752                           | 0.564                              |
| 23        | AβC7-32      | C                   | R | V | W | C | A | V | 1971            | 0.65                            | 0.488                              |
| 24        | AβC7-40      | C                   | K | V | W | C | V | M | 1059            | 0.349                           | 0.262                              |
| 25        | AβC7-41      | C                   | R | V | W | Q | C | V | 1028            | 0.339                           | 0.254                              |
| 26        | AβC7-43      | C                   | A | V | W | M | Q | L | 953             | 0.314                           | 0.236                              |
| 27        | AβC7-49      | C                   | R | V | W | M | M | L | 815             | 0.269                           | 0.202                              |
| 28        | AβC7-50      | C                   | R | V | W | S | V | V | 803             | 0.265                           | 0.199                              |
| 29        | AβC7-51      | C                   | R | V | W | Q | E | V | 796             | 0.262                           | 0.197                              |
| 30        | AβC7-52      | C                   | V | V | W | Q | Q | I | 790             | 0.261                           | 0.195                              |
| 31        | AβC7-58      | C                   | Q | V | W | M | D | L | 608             | 0.2                             | 0.15                               |
| 32        | AβC7-60      | C                   | R | V | W | Q | D | P | 575             | 0.19                            | 0.142                              |
| 33        | AβC7-62      | C                   | R | V | W | M | L | L | 486             | 0.16                            | 0.12                               |
| 34        | AβC7-63      | C                   | V | V | W | Q | L | L | 473             | 0.156                           | 0.117                              |
| 35        | AβC7-67      | C                   | R | V | W | Y | G | I | 435             | 0.143                           | 0.108                              |

| Cluster I |              |                     |   |   |   |   |   |   |                 |                                 |                                    |
|-----------|--------------|---------------------|---|---|---|---|---|---|-----------------|---------------------------------|------------------------------------|
| Number    | Peptide name | Amino acid sequence |   |   |   |   |   |   | Number of reads | Reads/Total Cluster I reads (%) | Reads/Total heptapeptide reads (%) |
| 36        | AβC7-70      | C                   | A | V | W | Q | L | L | 376             | 0.124                           | 0.093                              |
| 37        | AβC7-72      | C                   | N | V | W | Q | V | V | 361             | 0.119                           | 0.089                              |
| 38        | AβC7-75      | C                   | K | V | W | T | V | V | 335             | 0.11                            | 0.083                              |
| 39        | AβC7-76      | C                   | V | V | W | C | Q | P | 326             | 0.108                           | 0.081                              |
| 40        | AβC7-77      | C                   | R | V | W | M | A | A | 318             | 0.105                           | 0.079                              |
| 41        | AβC7-78      | C                   | R | V | W | M | T | V | 316             | 0.104                           | 0.078                              |
| 42        | AβC7-80      | C                   | R | V | W | Q | T | R | 296             | 0.098                           | 0.073                              |
| 43        | AβC7-83      | C                   | H | V | W | S | V | V | 287             | 0.095                           | 0.071                              |
| 44        | AβC7-85      | C                   | Y | V | W | C | P | L | 273             | 0.09                            | 0.068                              |
| 45        | AβC7-90      | C                   | R | V | W | E | L | L | 227             | 0.075                           | 0.056                              |
| 46        | AβC7-91      | C                   | R | V | R | Q | E | L | 220             | 0.073                           | 0.054                              |
| 47        | AβC7-93      | C                   | R | V | W | C | F | C | 218             | 0.072                           | 0.054                              |
| 48        | AβC7-94      | C                   | A | V | W | C | W | P | 212             | 0.07                            | 0.052                              |
| 49        | AβC7-95      | C                   | K | V | W | M | W | K | 211             | 0.07                            | 0.052                              |
| 50        | AβC7-97      | C                   | R | V | W | S | V | P | 207             | 0.068                           | 0.051                              |
| 51        | AβC7-102     | C                   | R | V | W | T | Q | V | 191             | 0.063                           | 0.047                              |
| 52        | AβC7-108     | C                   | K | V | F | Q | V | L | 173             | 0.057                           | 0.043                              |
| 53        | AβC7-112     | C                   | R | V | A | A | V | L | 165             | 0.054                           | 0.041                              |
| 54        | AβC7-113     | C                   | R | V | W | C | L | P | 165             | 0.054                           | 0.041                              |
| 55        | AβC7-115     | C                   | R | V | W | S | V | R | 163             | 0.054                           | 0.04                               |
| 56        | AβC7-118     | C                   | V | V | W | C | T | R | 161             | 0.053                           | 0.04                               |
| 57        | AβC7-126     | C                   | L | V | W | M | G | L | 153             | 0.05                            | 0.038                              |
| 58        | AβC7-134     | C                   | S | V | W | Q | S | L | 137             | 0.045                           | 0.034                              |
| 59        | AβC7-137     | C                   | R | V | W | S | P | C | 134             | 0.044                           | 0.033                              |
| 60        | AβC7-141     | C                   | F | V | W | Q | C | R | 125             | 0.041                           | 0.031                              |
| 61        | AβC7-145     | C                   | R | V | W | C | I | I | 122             | 0.04                            | 0.03                               |
| 62        | AβC7-146     | C                   | R | V | W | V | P | L | 121             | 0.04                            | 0.03                               |
| 63        | AβC7-155     | C                   | R | V | S | Q | A | L | 107             | 0.035                           | 0.026                              |
| 64        | AβC7-164     | C                   | R | V | W | S | H | P | 98              | 0.032                           | 0.024                              |
| 65        | AβC7-166     | C                   | R | W | W | G | G | I | 97              | 0.032                           | 0.024                              |
| 66        | AβC7-174     | C                   | I | V | W | Q | C | L | 88              | 0.029                           | 0.022                              |
| 67        | AβC7-177     | C                   | R | V | W | A | L | L | 85              | 0.028                           | 0.021                              |
| 68        | AβC7-179     | C                   | R | V | S | C | P | L | 84              | 0.028                           | 0.021                              |
| 69        | AβC7-181     | C                   | V | V | W | Q | G | L | 84              | 0.028                           | 0.021                              |
| 70        | AβC7-192     | C                   | V | V | W | S | P | L | 77              | 0.025                           | 0.019                              |
| 71        | AβC7-204     | C                   | R | V | W | G | A | T | 71              | 0.023                           | 0.018                              |
| 72        | AβC7-206     | C                   | V | V | W | C | A | P | 70              | 0.023                           | 0.017                              |
| 73        | AβC7-209     | C                   | V | V | W | S | S | L | 69              | 0.023                           | 0.017                              |
| 74        | AβC7-214     | C                   | L | V | W | C | P | L | 66              | 0.022                           | 0.016                              |
| 75        | AβC7-220     | C                   | R | V | W | S | G | L | 60              | 0.02                            | 0.015                              |
| 76        | AβC7-227     | C                   | R | V | A | Q | A | L | 56              | 0.018                           | 0.014                              |

| Cluster I |              |                     |   |   |   |   |   |   |                 |                                 |                                    |
|-----------|--------------|---------------------|---|---|---|---|---|---|-----------------|---------------------------------|------------------------------------|
| Number    | Peptide name | Amino acid sequence |   |   |   |   |   |   | Number of reads | Reads/Total Cluster I reads (%) | Reads/Total heptapeptide reads (%) |
| 77        | AβC7-230     | C                   | R | V | S | A | A | L | 54              | 0.018                           | 0.013                              |
| 78        | AβC7-231     | C                   | K | V | W | C | G | L | 54              | 0.018                           | 0.013                              |
| 79        | AβC7-232     | C                   | V | V | T | P | V | V | 54              | 0.018                           | 0.013                              |
| 80        | AβC7-234     | C                   | R | V | T | A | A | L | 54              | 0.018                           | 0.013                              |
| 81        | AβC7-241     | C                   | A | V | W | Q | A | V | 51              | 0.017                           | 0.013                              |
| 82        | AβC7-245     | C                   | R | V | W | S | A | V | 50              | 0.016                           | 0.012                              |
| 83        | AβC7-251     | C                   | V | V | W | S | T | I | 48              | 0.016                           | 0.012                              |
| 84        | AβC7-255     | C                   | R | V | Y | C | V | P | 46              | 0.015                           | 0.011                              |
| 85        | AβC7-262     | C                   | R | V | W | C | A | F | 44              | 0.015                           | 0.011                              |
| 86        | AβC7-279     | S                   | A | V | R | C | V | W | 39              | 0.013                           | 0.01                               |
| 87        | AβC7-287     | C                   | R | V | L | C | L | G | 38              | 0.013                           | 0.009                              |
| 88        | AβC7-303     | C                   | K | A | W | Q | S | L | 34              | 0.011                           | 0.008                              |
| 89        | AβC7-306     | C                   | R | V | W | Q | W | V | 34              | 0.011                           | 0.008                              |
| 90        | AβC7-329     | C                   | F | V | W | E | A | L | 29              | 0.01                            | 0.007                              |
| 91        | AβC7-331     | C                   | R | V | W | S | E | V | 28              | 0.009                           | 0.007                              |
| 92        | AβC7-340     | C                   | R | V | R | Q | D | L | 27              | 0.009                           | 0.007                              |
| 93        | AβC7-344     | C                   | A | V | W | M | M | L | 27              | 0.009                           | 0.007                              |
| 94        | AβC7-349     | C                   | R | V | W | Q | H | V | 26              | 0.009                           | 0.006                              |
| 95        | AβC7-354     | C                   | Y | V | W | Q | S | R | 26              | 0.009                           | 0.006                              |
| 96        | AβC7-355     | C                   | R | V | W | S | M | I | 26              | 0.009                           | 0.006                              |
| 97        | AβC7-356     | C                   | S | V | W | C | P | L | 26              | 0.009                           | 0.006                              |
| 98        | AβC7-364     | C                   | R | V | Y | M | E | L | 25              | 0.008                           | 0.006                              |
| 99        | AβC7-366     | C                   | R | V | W | S | W | R | 24              | 0.008                           | 0.006                              |
| 100       | AβC7-378     | C                   | L | V | R | Q | E | L | 23              | 0.008                           | 0.006                              |
| 101       | AβC7-396     | C                   | K | V | W | R | L | L | 21              | 0.007                           | 0.005                              |
| 102       | AβC7-398     | C                   | W | V | W | Q | S | L | 21              | 0.007                           | 0.005                              |
| 103       | AβC7-399     | C                   | F | V | W | T | T | L | 21              | 0.007                           | 0.005                              |
| 104       | AβC7-401     | C                   | V | V | W | H | V | V | 21              | 0.007                           | 0.005                              |
| 105       | AβC7-407     | C                   | V | P | G | A | V | R | 20              | 0.007                           | 0.005                              |
| 106       | AβC7-409     | C                   | R | V | W | R | T | L | 20              | 0.007                           | 0.005                              |
| 107       | AβC7-416     | C                   | V | V | W | T | T | R | 20              | 0.007                           | 0.005                              |
|           |              | <b>Sum</b>          |   |   |   |   |   |   | <b>303,245</b>  | <b>100</b>                      | <b>75.01</b>                       |

| Cluster II |              |                     |   |   |   |   |   |   |                 |                                  |                                    |
|------------|--------------|---------------------|---|---|---|---|---|---|-----------------|----------------------------------|------------------------------------|
| Number     | Peptide name | Amino acid sequence |   |   |   |   |   |   | Number of reads | Reads/Total Cluster II reads (%) | Reads/Total heptapeptide reads (%) |
| 1          | AβC7-14      | C                   | R | I | V | P | S | L | 6435            | 32.682                           | 1.592                              |
| 2          | AβC7-16      | C                   | I | V | V | P | S | I | 5871            | 29.817                           | 1.452                              |
| 3          | AβC7-28      | C                   | R | V | V | P | A | I | 2408            | 12.230                           | 0.596                              |
| 4          | AβC7-31      | C                   | Q | V | V | P | S | V | 2004            | 10.178                           | 0.496                              |
| 5          | AβC7-54      | C                   | V | V | V | P | S | I | 655             | 3.327                            | 0.162                              |
| 6          | AβC7-59      | C                   | V | V | V | P | S | L | 582             | 2.956                            | 0.144                              |
| 7          | AβC7-81      | C                   | L | V | V | P | S | V | 291             | 1.478                            | 0.072                              |
| 8          | AβC7-89      | C                   | D | I | I | P | S | L | 228             | 1.158                            | 0.056                              |
| 9          | AβC7-101     | C                   | Y | Y | V | P | S | L | 198             | 1.006                            | 0.049                              |
| 10         | AβC7-106     | C                   | T | Y | V | P | S | L | 179             | 0.909                            | 0.044                              |
| 11         | AβC7-114     | C                   | R | V | V | P | S | L | 164             | 0.833                            | 0.041                              |
| 12         | AβC7-160     | C                   | K | V | V | P | T | L | 101             | 0.513                            | 0.025                              |
| 13         | AβC7-173     | C                   | E | V | V | P | S | L | 91              | 0.462                            | 0.023                              |
| 14         | AβC7-203     | C                   | W | T | V | G | T | I | 71              | 0.361                            | 0.018                              |
| 15         | AβC7-219     | C                   | T | Y | V | P | S | I | 63              | 0.320                            | 0.016                              |
| 16         | AβC7-228     | C                   | R | V | V | P | P | I | 55              | 0.279                            | 0.014                              |
| 17         | AβC7-259     | C                   | W | V | V | G | S | I | 44              | 0.223                            | 0.011                              |
| 18         | AβC7-261     | C                   | I | I | V | P | S | L | 44              | 0.223                            | 0.011                              |
| 19         | AβC7-276     | C                   | W | M | V | G | S | I | 41              | 0.208                            | 0.010                              |
| 20         | AβC7-302     | C                   | Y | W | V | P | S | L | 34              | 0.173                            | 0.008                              |
| 21         | AβC7-312     | C                   | E | F | V | P | T | L | 33              | 0.168                            | 0.008                              |
| 22         | AβC7-335     | C                   | M | F | V | P | T | L | 28              | 0.142                            | 0.007                              |
| 23         | AβC7-351     | C                   | W | L | V | G | T | I | 26              | 0.132                            | 0.006                              |
| 24         | AβC7-370     | C                   | T | V | V | P | S | V | 24              | 0.122                            | 0.006                              |
| 25         | AβC7-405     | C                   | R | V | V | C | S | I | 20              | 0.102                            | 0.005                              |
|            |              | <b>Sum</b>          |   |   |   |   |   |   | <b>19,690</b>   | <b>100</b>                       | <b>4.87</b>                        |

**Table S5. Molecular properties of the selected cyclic heptapeptides A $\beta$ C7-1 and A $\beta$ C7-14 compared to those of conventional drugs, oral macrocyclic (MC) drugs and nonoral MC drugs.**

| Property*             | Conventional drugs | Oral MC drugs <sup>†</sup> | Non-oral MC drugs <sup>†</sup> | A $\beta$ C7-1 <sup>‡</sup> | A $\beta$ C7-14 <sup>‡</sup> |
|-----------------------|--------------------|----------------------------|--------------------------------|-----------------------------|------------------------------|
| MW                    | ≤500               | 600 to 1200                | 600 to 1300                    | 870                         | 768                          |
| cLogP                 | ≤5                 | -2 to 6                    | -7 to 2                        | 3.7                         | 2.2                          |
| PSA (Å <sup>2</sup> ) | ≤140               | 180 to 320                 | 150 to 500                     | 285                         | 277                          |
| HBDs                  | ≤5                 | ≤12                        | ≤17                            | 11                          | 11                           |
| HBA                   | ≤10                | 12 to 16                   | 9 to 20                        | 10                          | 11                           |
| N <sub>RB</sub>       | ≤10                | ≤15                        | ≤30                            | 15                          | 12                           |

\*Abbreviations – MC: macrocyclic; MW: molecular weight; cLogP: calculated octanol/water partition coefficient; PSA: polar surface area; HBD: hydrogen bond donor; HBA: hydrogen bond acceptor; N<sub>RB</sub>: number of rotatable bonds.

<sup>†</sup>According to Villar et al. (19).

<sup>‡</sup>As predicted using the PerkinElmer ChemBio3D software

**Table S6. Plasmids and PCR primers used in this study.**

| Plasmid                                                                                                            | Encoded Protein                                                                                                                               | Marker           | Origin of replication | Source            |
|--------------------------------------------------------------------------------------------------------------------|-----------------------------------------------------------------------------------------------------------------------------------------------|------------------|-----------------------|-------------------|
| pETA $\beta$ 42-GFP                                                                                                | A $\beta$ 42-GFP                                                                                                                              | Kan <sup>R</sup> | ColE1                 | Matis et al. (18) |
| pETp53(Y220C)-GFP                                                                                                  | p53C(Y220C)-GFP                                                                                                                               | Kan <sup>R</sup> | ColE1                 | Matis et al. (18) |
| pSICLOPPS                                                                                                          | I <sub>C</sub> -SGGYLPPL-I <sub>N</sub> -CBD                                                                                                  | Cm <sup>R</sup>  | ACYC                  | Matis et al. (18) |
| pSICLOPPS-CysX <sub>1</sub> X <sub>2</sub> X <sub>3</sub> X <sub>4</sub> X <sub>5</sub> X <sub>6</sub> sub-library | I <sub>C</sub> -CysX <sub>1</sub> X <sub>2</sub> X <sub>3</sub> X <sub>4</sub> X <sub>5</sub> X <sub>6</sub> -I <sub>N</sub> -CBD sub-library | Cm <sup>R</sup>  | ACYC                  | This work         |
| pSICLOPPS-SerX <sub>1</sub> X <sub>2</sub> X <sub>3</sub> X <sub>4</sub> X <sub>5</sub> X <sub>6</sub> sub-library | I <sub>C</sub> -SerX <sub>1</sub> X <sub>2</sub> X <sub>3</sub> X <sub>4</sub> X <sub>5</sub> X <sub>6</sub> -I <sub>N</sub> -CBD sub-library | Cm <sup>R</sup>  | ACYC                  | This work         |
| pSICLOPPS-ThrX <sub>1</sub> X <sub>2</sub> X <sub>3</sub> X <sub>4</sub> X <sub>5</sub> X <sub>6</sub> sub-library | I <sub>C</sub> -ThrX <sub>1</sub> X <sub>2</sub> X <sub>3</sub> X <sub>4</sub> X <sub>5</sub> X <sub>6</sub> -I <sub>N</sub> -CBD sub-library | Cm <sup>R</sup>  | ACYC                  | This work         |
| pSICLOPPSKanR                                                                                                      | I <sub>C</sub> -KanR                                                                                                                          | Cm <sup>R</sup>  | ACYC                  | Matis et al. (18) |
| pSICLOPPS-A $\beta$ C7-1                                                                                           | I <sub>C</sub> -CKVWQLL-I <sub>N</sub> -CBD                                                                                                   | Cm <sup>R</sup>  | ACYC                  | This work         |
| pSICLOPPS-A $\beta$ C7-1(C1S)                                                                                      | I <sub>C</sub> -SKVWQLL-I <sub>N</sub> -CBD                                                                                                   | Cm <sup>R</sup>  | ACYC                  | This work         |
| pSICLOPPS-A $\beta$ C7-1(C1T)                                                                                      | I <sub>C</sub> -TKVWQLL-I <sub>N</sub> -CBD                                                                                                   | Cm <sup>R</sup>  | ACYC                  | This work         |
| pSICLOPPS-A $\beta$ C7-1(K2A)                                                                                      | I <sub>C</sub> -CAVWQLL-I <sub>N</sub> -CBD                                                                                                   | Cm <sup>R</sup>  | ACYC                  | This work         |
| pSICLOPPS-A $\beta$ C7-1(V3A)                                                                                      | I <sub>C</sub> -CKAWQLL-I <sub>N</sub> -CBD                                                                                                   | Cm <sup>R</sup>  | ACYC                  | This work         |
| pSICLOPPS-A $\beta$ C7-1(W4A)                                                                                      | I <sub>C</sub> -CKVAQLL-I <sub>N</sub> -CBD                                                                                                   | Cm <sup>R</sup>  | ACYC                  | This work         |
| pSICLOPPS-A $\beta$ C7-1(Q5A)                                                                                      | I <sub>C</sub> -CKVWALL-I <sub>N</sub> -CBD                                                                                                   | Cm <sup>R</sup>  | ACYC                  | This work         |
| pSICLOPPS-A $\beta$ C7-1(L6A)                                                                                      | I <sub>C</sub> -CKVWQAL-I <sub>N</sub> -CBD                                                                                                   | Cm <sup>R</sup>  | ACYC                  | This work         |
| pSICLOPPS-A $\beta$ C7-1(L7A)                                                                                      | I <sub>C</sub> -CKVWQLA-I <sub>N</sub> -CBD                                                                                                   | Cm <sup>R</sup>  | ACYC                  | This work         |
| pSICLOPPS-A $\beta$ C7-14                                                                                          | I <sub>C</sub> -CRIVPSL-I <sub>N</sub> -CBD                                                                                                   | Cm <sup>R</sup>  | ACYC                  | This work         |
| pSICLOPPS-A $\beta$ C7-14(C1S)                                                                                     | I <sub>C</sub> -SRIVPSL-I <sub>N</sub> -CBD                                                                                                   | Cm <sup>R</sup>  | ACYC                  | This work         |
| pSICLOPPS-A $\beta$ C7-14(C1T)                                                                                     | I <sub>C</sub> -TRIVPSL-I <sub>N</sub> -CBD                                                                                                   | Cm <sup>R</sup>  | ACYC                  | This work         |
| pSICLOPPS-A $\beta$ C7-14(R2A)                                                                                     | I <sub>C</sub> -CAIVPSL-I <sub>N</sub> -CBD                                                                                                   | Cm <sup>R</sup>  | ACYC                  | This work         |
| pSICLOPPS-A $\beta$ C7-14(I3A)                                                                                     | I <sub>C</sub> -CRAVPSL-I <sub>N</sub> -CBD                                                                                                   | Cm <sup>R</sup>  | ACYC                  | This work         |



| Plasmid                              | Encoded Protein                                               | Marker           | Origin of replication | Source            |
|--------------------------------------|---------------------------------------------------------------|------------------|-----------------------|-------------------|
| pSICLOPPS-A $\beta$ C7-14(V4A)       | I <sub>C</sub> -CRIAPSL-I <sub>N</sub> -CBD                   | Cm <sup>R</sup>  | ACYC                  | This work         |
| pSICLOPPS-A $\beta$ C7-14(P5A)       | I <sub>C</sub> -CRIVASL-I <sub>N</sub> -CBD                   | Cm <sup>R</sup>  | ACYC                  | This work         |
| pSICLOPPS-A $\beta$ C7-14(S6A)       | I <sub>C</sub> -CRIVPAL-I <sub>N</sub> -CBD                   | Cm <sup>R</sup>  | ACYC                  | This work         |
| pSICLOPPS-A $\beta$ C7-14(L7A)       | I <sub>C</sub> -CRIVPSA-I <sub>N</sub> -CBD                   | Cm <sup>R</sup>  | ACYC                  | This work         |
| pSICLOPPS-Random1                    | I <sub>C</sub> -unknown peptide sequence1-I <sub>N</sub> -CBD | Cm <sup>R</sup>  | ACYC                  | Matis et al. (18) |
| pSICLOPPS-Random2                    | I <sub>C</sub> -unknown peptide sequence2-I <sub>N</sub> -CBD | Cm <sup>R</sup>  | ACYC                  | Matis et al. (18) |
| pSICLOPPS(H24L/F26A)-A $\beta$ C7-1  | I <sub>C</sub> (H24L/F26A)-CKVWQLL-I <sub>N</sub> -CBD        | Cm <sup>R</sup>  | ACYC                  | This work         |
| pSICLOPPS(H24L/F26A)-A $\beta$ C7-2  | I <sub>C</sub> (H24L/F26A)-CKVWMPL-I <sub>N</sub> -CBD        | Cm <sup>R</sup>  | ACYC                  | This work         |
| pSICLOPPS(H24L/F26A)-A $\beta$ C7-3  | I <sub>C</sub> (H24L/F26A)-CKVWTEL-I <sub>N</sub> -CBD        | Cm <sup>R</sup>  | ACYC                  | This work         |
| pSICLOPPS(H24L/F26A)-A $\beta$ C7-7  | I <sub>C</sub> (H24L/F26A)-CRVWQTV-I <sub>N</sub> -CBD        | Cm <sup>R</sup>  | ACYC                  | This work         |
| pSICLOPPS(H24L/F26A)-A $\beta$ C7-14 | I <sub>C</sub> (H24L/F26A)-CRIVPSL-I <sub>N</sub> -CBD        | Cm <sup>R</sup>  | ACYC                  | This work         |
| pSICLOPPS-A $\beta$ C7-2             | I <sub>C</sub> -CKVWMPL-I <sub>N</sub> -CBD                   | Cm <sup>R</sup>  | ACYC                  | This work         |
| pSICLOPPS-A $\beta$ C7-3             | I <sub>C</sub> -CKVWTEL-I <sub>N</sub> -CBD                   | Cm <sup>R</sup>  | ACYC                  | This work         |
| pSICLOPPS-A $\beta$ C7-7             | I <sub>C</sub> -CRVWQTV-I <sub>N</sub> -CBD                   | Cm <sup>R</sup>  | ACYC                  | This work         |
| pSICLOPPS-A $\beta$ C7-371           | I <sub>C</sub> -CLVRSYL-I <sub>N</sub> -CBD                   | Cm <sup>R</sup>  | ACYC                  | This work         |
| pSICLOPPS-A $\beta$ C7-405           | I <sub>C</sub> -CRVVCSI-I <sub>N</sub> -CBD                   | Cm <sup>R</sup>  | ACYC                  | This work         |
| pSICLOPPS-A $\beta$ C7-416           | I <sub>C</sub> -CVVWTTR-I <sub>N</sub> -CBD                   | Cm <sup>R</sup>  | ACYC                  | This work         |
| pSICLOPPS(H24L/F26A)KanR             | I <sub>C</sub> (H24L/F26A)KanR                                | Cm <sup>R</sup>  | ACYC                  | Matis et al. (18) |
| pETA $\beta$ 42                      | Met-A $\beta$ 42 (for ThS experiments)                        | Kan <sup>R</sup> | ColE1                 | This work         |
| pET-Sac-Abeta(M1-42)                 | Met-A $\beta$ 42 (for <i>in vitro</i> experiments)            | Amp <sup>R</sup> | ColE1                 | Walsh et al. (53) |

| Name  | Primer sequence (5'-3')                                                              | Use                                                                                                                                                                                                |
|-------|--------------------------------------------------------------------------------------|----------------------------------------------------------------------------------------------------------------------------------------------------------------------------------------------------|
| GS078 | GGAATT <u>CGCCAATGGGGCGATCGCC</u><br>CACAATTGC(NNS) <sub>6</sub> TGCTTAAGTTTT<br>GGC | Degenerate forward primer for the construction of the CysX <sub>1</sub> X <sub>2</sub> X <sub>3</sub> X <sub>4</sub> X <sub>5</sub> X <sub>6</sub> sub-library containing a BglI site (underlined) |
| GS079 | GGAATT <u>CGCCAATGGGGCGATCGCC</u><br>CACAATAGC(NNS) <sub>6</sub> TGCTTAAGTTTT<br>GGC | Degenerate forward primer for the construction of the SerX <sub>1</sub> X <sub>2</sub> X <sub>3</sub> X <sub>4</sub> X <sub>5</sub> X <sub>6</sub> sub-library containing a BglI site (underlined) |
| GS080 | GGAATT <u>CGCCAATGGGGCGATCGCC</u><br>CACAATACC(NNS) <sub>6</sub> TGCTTAAGTTTT<br>GGC | Degenerate forward primer for the construction of the ThrX <sub>1</sub> X <sub>2</sub> X <sub>3</sub> X <sub>4</sub> X <sub>5</sub> X <sub>6</sub> sub-library containing a BglI site (underlined) |
| GS035 | AAAAAA <u>AAGCTTTCATTGAAGCTGC</u><br>CACAAGG                                         | Reverse primer annealing to CBD containing a HindIII site (underlined)                                                                                                                             |
| GS069 | AAAAA <u>AGCCAATGGGGCGATCGCC</u><br>CACAATTGC                                        | Forward zipper primer for the construction of the Cys sub-libraries containing a BglI site (underlined)                                                                                            |
| GS070 | AAAAA <u>AGCCAATGGGGCGATCGCC</u><br>CACAATAGC                                        | Forward zipper primer for the construction of the Ser sub-libraries containing a BglI site (underlined)                                                                                            |
| GS071 | AAAAA <u>AGCCAATGGGGCGATCGCC</u><br>CACAATACC                                        | Forward zipper primer for the construction of the Thr sub-libraries containing a BglI site (underlined)                                                                                            |
| DD129 | AAAAA <u>AGCCAATGGGGCGATCGCCC</u><br>ACAATAGCAAGGTGTGGCAGTTG                         | Forward primer for the construction of pSICLOPPS-AβC7-1(C1S) containing a BglI site (underlined)                                                                                                   |
| DD130 | AAAAA <u>AGCCAATGGGGCGATCGCCC</u><br>ACAATACCAAGGTGTGGCAGTTG                         | Forward primer for the construction of pSICLOPPS-AβC7-1(C1T) containing a BglI site (underlined)                                                                                                   |
| DD131 | AAAAA <u>AGCCAATGGGGCGATCGCCC</u><br>ACAATTGCGCGGTGTGGCAGTTGTT<br>G                  | Forward primer for the construction of pSICLOPPS-AβC7-1(K2A) containing a BglI site (underlined)                                                                                                   |
| DD132 | AAAAA <u>AGCCAATGGGGCGATCGCCC</u><br>ACAATTGCAAGCGTGGCAGTTGTT<br>GTGC                | Forward primer for the construction of pSICLOPPS-AβC7-1(V3A) containing a BglI site (underlined)                                                                                                   |
| DD133 | AAAAA <u>AGCCAATGGGGCGATCGCCC</u><br>ACAATTGCAAGGTGGCGCAGTTGTT<br>GTGCTTAAG          | Forward primer for the construction of pSICLOPPS-AβC7-1(W4A) containing a BglI site (underlined)                                                                                                   |
| DD134 | AAAAA <u>AGCCAATGGGGCGATCGCCC</u><br>ACAATTGCAAGGTGTGGGCGTTGTT<br>GTGCTTAAG          | Forward primer for the construction of pSICLOPPS-AβC7-1(Q5A) containing a BglI site (underlined)                                                                                                   |
| DD135 | AAAAA <u>AGCCAATGGGGCGATCGCCC</u><br>ACAATTGCAAGGTGTGGCAGGCGTT<br>GTGCTTAAGTTTTG     | Forward primer for the construction of pSICLOPPS-AβC7-1(L6A) containing a BglI site (underlined)                                                                                                   |
| DD136 | AAAAA <u>AGCCAATGGGGCGATCGCCC</u><br>ACAATTGCAAGGTGTGGCAGTTGGC<br>GTGCTTAAGTTTTGG    | Forward primer for the construction of pSICLOPPS-AβC7-1(L7A) containing a BglI site (underlined)                                                                                                   |
| DD137 | AAAAA <u>AGCCAATGGGGCGATCGCCC</u><br>ACAATAGCCGCATCGTCCCCAG                          | Forward primer for the construction of pSICLOPPS-AβC7-14(C1S) containing a BglI site (underlined)                                                                                                  |

| Name  | Primer sequence (5'-3')                                                  | Use                                                                                                   |
|-------|--------------------------------------------------------------------------|-------------------------------------------------------------------------------------------------------|
| DD138 | AAAAAGCCAATGGGGCGATCGCCC<br>ACAATACCCGCATCGTCCCCAG                       | Forward primer for the construction of pSICLOPPS-<br>AβC7-14(C1T) containing a BglI site (underlined) |
| DD139 | AAAAAGCCAATGGGGCGATCGCCC<br>ACAATTGCGCCATCGTCCCCAGCTT<br>G               | Forward primer for the construction of pSICLOPPS-<br>AβC7-14(R2A) containing a BglI site (underlined) |
| DD140 | AAAAAGCCAATGGGGCGATCGCCC<br>ACAATTGCCGCGCCGTCCCCAGCTT<br>GTGC            | Forward primer for the construction of pSICLOPPS-<br>AβC7-14(I3A) containing a BglI site (underlined) |
| DD141 | AAAAAGCCAATGGGGCGATCGCCC<br>ACAATTGCCGCATCGCCCCAGCTT<br>GTGCTTAAG        | Forward primer for the construction of pSICLOPPS-<br>AβC7-14(V4A) containing a BglI site (underlined) |
| DD142 | AAAAAGCCAATGGGGCGATCGCCC<br>ACAATTGCCGCATCGTCGCCAGCTT<br>GTGCTTAAG       | Forward primer for the construction of pSICLOPPS-<br>AβC7-14(P5A) containing a BglI site (underlined) |
| DD143 | AAAAAGCCAATGGGGCGATCGCCC<br>ACAATTGCCGCATCGTCCCCGCCTT<br>GTGCTTAAGTTTTG  | Forward primer for the construction of pSICLOPPS-<br>AβC7-14(L6A) containing a BglI site (underlined) |
| DD144 | AAAAAGCCAATGGGGCGATCGCCC<br>ACAATTGCCGCATCGTCCCCAGCGC<br>GTGCTTAAGTTTTGG | Forward primer for the construction of pSICLOPPS-<br>AβC7-14(L7A) containing a BglI site (underlined) |
| DD175 | AAAAAGCCAATGGGGCGATCGCCC<br>ACAATTGCGTGGTCTGGACGACCCG<br>GTGCTTAAGTTTTG  | Forward primer for the construction of pSICLOPPS-<br>AβC7-416 containing a BglI site (underlined)     |
| DD176 | AAAAAGCCAATGGGGCGATCGCCC<br>ACAATTGCCGGTGGTGTGCAGCAT<br>CTGCTTAAGTTTTG   | Forward primer for the construction of pSICLOPPS-<br>AβC7-405 containing a BglI site (underlined)     |
| DD178 | AAAAAGCCAATGGGGCGATCGCCC<br>ACAATTGCCTGGTGAGGTCCTACCT<br>GTGCTTAAGTTTTG  | Forward primer for the construction of pSICLOPPS-<br>AβC7-371 containing a BglI site (underlined)     |
| DD004 | AAAAACCATGGATGCGGAATTTTCG<br>CATG                                        | Forward primer for the construction of Met-Aβ42<br>containing a NcoI site (underlined)                |
| IM022 | CCGCTCGAGTTACGCAATCACCACG<br>CCGCCCAC                                    | Reverse primer for the construction of Met-Aβ42<br>containing a XhoI site (underlined)                |
